# Supplementary material for: Lanthanum Supplementation Alleviates Tomato Root Growth Suppression under Low Light Stress
Source: MDPI journal article supplement (doi:10.3390/plants12142663), 2023-07-16
Supplement: s1 [file s1]

**Table S1.** Primers for qRT-PCR analysis of genes expressed in tomato roots under low light stress.

| Gene name                                                | Primers                              | Nucleotide sequences (5'→3')                      | Size of amplified gene (bp) |
|----------------------------------------------------------|--------------------------------------|---------------------------------------------------|-----------------------------|
| Superoxide dismutase                                     | Solyc11g066390 F<br>Solyc11g066390 R | CGGTCCAACTCAGTTGTTG<br>CAGCATTGCCAGTGGTAAGA       | 101                         |
| Ascorbate peroxidase                                     | Solyc06g005150 F<br>Solyc06g005150 R | AGCCCATTAGGGAGCAGTTT<br>GAACATCAGGTCTCCCGTAAC     | 96                          |
| Catalase                                                 | Solyc04g082460 F<br>Solyc04g082460 R | GGCTTGATCCTTGTCTCAT<br>CGGTGCCCAAGATCTGTAAT       | 134                         |
| Glutathione peroxidase                                   | Solyc09g064850 F<br>Solyc09g064850 R | TGGGAGCTTCCAAATCAGTT<br>TGTGCTTGTGAACCCACATT      | 146                         |
| Chalcone flavanone isomerase                             | Solyc02g083890 F<br>Solyc02g083890 R | TGGGAAACATCAGCATTGA<br>CCAAATTCCTCATAGCAAGA       | 71                          |
| MYB transcription factor                                 | Solyc06g075660 F<br>Solyc06g075660 R | ACCAGGGCGAAGTATAATG<br>TGGCAGAGGAAGAGGAACAA       | 134                         |
| Phenylalanine ammonia lyase                              | Solyc05g056170 F<br>Solyc05g056170 R | TACATTGCCGGCTTTTAAC<br>AATACCAGCCTGTTGGAACG       | 99                          |
| Trans-cinnamate 4 hydroxylase                            | Solyc05g047530 F<br>Solyc05g047530 R | GTTGGCTAACCAACCTGCAT<br>ACCTTACCACCAGCAACAGC      | 105                         |
| Gibberellin 2-oxidase                                    | Solyc01g079200 F<br>Solyc01g079200 R | TTCTAGGGGACTCCTTTTCAG<br>TTGACACCACTCTATGTCTTACAC | 70                          |
| Abscisic acid stress ripening protein                    | Solyc04g071590 F<br>Solyc04g071590 R | AGCACCATAGCCATCTCCAG<br>GGTCTTTCTTTGCCTTGTGC      | 93                          |
| Ethylene-responsive transcription factor                 | Solyc04g071770 F<br>Solyc04g071770 R | TGGAGAATCATCTTCTCTGTTA<br>CGATATGCTGCTCGTTTGTG    | 73                          |
| EIN3-binding F-box protein                               | Solyc12g009560 F<br>Solyc12g009560 R | AACCTTAGCGACTGCCTGAA<br>CATCGGTAACCTTCTCTGCAT     | 112                         |
| Cytokinin riboside 5'-monophosphate phosphoribohydrolase | Solyc08g062820 F<br>Solyc08g062820 R | TGGTGGAAGTGTGGATTGA<br>TCATGCATGTCGGAACAAAT       | 150                         |
| Heavy metal-associated isoprenylated plant protein 26    | Solyc11g007200 F<br>Solyc11g007200 R | TGTCATGCCAAGGTTGTGTT<br>TTCCGGTTCACATTTCTCTA      | 122                         |
| Heavy metal-associated isoprenylated plant protein 3     | Solyc09g008200 F<br>Solyc09g008200 R | GGAGACAAAGTCCGAAGCGA<br>CACAGGCATCGCGTAATGTG      | 73                          |
| NAC domain                                               | Solyc03g097650 F<br>Solyc03g097650 R | TTCTTGTCCCTTGCCTGCTT<br>TCACCAGGCAAAATCCAGGG      | 75                          |
| Clathrin light chain                                     | Solyc03g006510 F<br>Solyc03g006510 R | AGGCTTACGATCTCGGTGAA<br>TCAAGACGGACAGCATTTTG      | 133                         |
| Anaphase promoting complex subunit 13                    | Solyc08g006570 F<br>Solyc08g006570 R | TCCCCTTACCACCCGTAATGAC<br>AGGTGCTGCCATGTATCTCC    | 94                          |
| Auxin responsive SAUR protein                            | Solyc12g089270 F<br>Solyc12g089270 R | GGGCCCCAATTACAAAAGAT<br>GGAATGACTAATGGGCCAGAG     | 123                         |
| Small auxin up-regulated RNA6                            | Solyc01g110590 F<br>Solyc01g110590 R | GCCTTCCAATTGACGTACC<br>CGAACCCAAATTTCTCTCA        | 141                         |
| Phytochrome-interacting factor 4 (PIF4)                  | Solyc07g043580 F<br>Solyc07g043580 R | ATGAAGGCCTTGCAAGAGCT<br>GCCACTTCCCATCCACATCA      | 126                         |
| Phytochrome-interacting factor 7 (PIF7)                  | Solyc03g115540 F<br>Solyc03g115540 R | TTCTGTTAGCCCTGCCAGTG<br>GCCGATACAAAGCTGCCATG      | 131                         |
| Transcription factor Nozzle                              | Solyc07g063670 F<br>Solyc07g063670 R | CTTACTGCCTTCTCCCAACC<br>CTCCCGTTGAGGTCTGGTTC      | 144                         |
| Photosystem II reaction center W protein                 | Solyc09g065910 F<br>Solyc09g065910 R | CATGTCAAGCCAGTAGCAAT<br>TCCAAATGGTAGCCCTGTTT      | 73                          |
| Chlorophyll <i>a-b</i> binding protein                   | Solyc06g063370 F<br>Solyc06g063370 R | CCGAGGGTCTATTGGACAGA<br>ATGCCTGATATTTGGCGAAG      | 123                         |
| Ribulose biphosphate carboxylase                         | Solyc10g086580 F<br>Solyc10g086580 R | AGTGGAATGCAGGAGAGCC<br>CTACCAGCTCCTGCATCGAG       | 122                         |
| Extensin-like protein                                    | Solyc02g030220 F<br>Solyc02g030220 R | GCTTTGGAATTTGGGACAAAG<br>AGCAACAACAGTGCTGGCTAC    | 77                          |
| Cellulose synthase                                       | Solyc01g087210 F<br>Solyc01g087210 R | CTGGTGGTGCAAAACATC<br>CTCCCTTACTGGGTCCACAAC       | 89                          |
| Pectin lyase                                             | Solyc12g019120 F<br>Solyc12g019120 R | TGGGGAATTGGTAATTCTGG<br>AGCCCAAAAACCATCTCCTT      | 102                         |
| Polygalacturonase                                        | Solyc03g116500 F<br>Solyc03g116500 R | AGATGGTATGGGCCAGGAGT<br>AAGCCGTTGGAGCATGATGA      | 80                          |
| Calcium-binding EF hand protein                          | Solyc10g044700 F<br>Solyc10g044700 R | TGTTGATGGTCCAATGATGG<br>TCAAAATGTTTGTCCGTCCA      | 75                          |
| Calcium binding protein CML 38                           | Solyc06g073830 F<br>Solyc06g073830 R | GCGATCAATTGGAGAGGGTA<br>CGTCGTTAAATCTCCGCCTA      | 110                         |
| Calcium-dependent lipid-binding protein                  | Solyc09g009370 F<br>Solyc09g009370 R | GAGCAGACAGATTGGTGCAA<br>AAAACAGCATGACACCACCA      | 122                         |
| Phosphate transporter                                    | Solyc03g005555 F<br>Solyc03g005555 R | AGCAGGCAAGCCAAAATCGA<br>GCCGTGGAACCAATTCAC        | 82                          |
| Potassium transporter                                    | Solyc02g087000 F<br>Solyc02g087000 R | GCATTACGGAACCTGAAGA<br>TACCCAGGTTGGGACTCAAG       | 89                          |
| GAPDH                                                    | Solyc05g014470 F<br>Solyc05g014470 R | AAGCTGGTGTGACTTCGTTG<br>CGTTGACACCCACAACAAAC      | 144                         |
